# Supplementary material for: Antioxidant, antimicrobial, and cytotoxic properties of chitosan–PVA films functionalised with chitooligosaccharide and gallic acid for shelf-life extension of perishable foods
Source: Royal Society of Chemistry journal article supplement (doi:10.1039/d5fb00775e), 2025-12-20
Supplement: d5fb00775e1.pdf [file d5fb00775e1.pdf]

**Antioxidant, antimicrobial, and cytotoxicity properties of chitosan-PVA film functionalised with chitooligosaccharide and gallic acid for shelf-life extension of perishable foods**

**Shuva Bhowmik<sup>1,2,3</sup>, Dominic Agyei<sup>4</sup>, Azam Ali<sup>1,2\*</sup>**

<sup>1</sup>Centre for Bioengineering and Nanomedicine, Faculty of Dentistry, Division of Health Sciences, University of Otago, Dunedin 9016, New Zealand

<sup>2</sup>Sir John Walsh Research Institute (SJWRI), Faculty of Dentistry, Division of Health Sciences, University of Otago, Dunedin 9016, New Zealand

<sup>3</sup>Department of Fisheries and Marine Science, Noakhali Science and Technology University, Noakhali, 3814, Bangladesh

<sup>4</sup>School of Chemistry, Faculty of Science, Monash University, Clayton VIC-3800, Australia

**\*Corresponding author:** Azam Ali, Professor and Director-Bioengineering Academic Program, Centre for Bioengineering & Nanomedicine, Faculty of Dentistry, Division of Health Sciences, University of Otago, 310 Great King Street North, Dunedin 9016, New Zealand, E-mail: [azam.ali@otago.ac.nz](mailto:azam.ali@otago.ac.nz), ORCID: 0000-0002-0136-6800

**Table S1** Composition and percentage of biomaterials in developing chitosan films.

| Film type | Chitosan (2%)<br>w/v | PVA (10%)<br>(w/w of CH) | COS<br>(w/w of CH) | GA<br>(w/w of CH) |
|-----------|----------------------|--------------------------|--------------------|-------------------|
| CH        | 0.4 g                | -                        | -                  | -                 |
| CP2       | 0.4 g                | 0.2 g                    | -                  | -                 |
| CP5       | 0.4 g                | 0.2 g                    | 0.02 g             | -                 |
| CP6       | 0.4 g                | 0.2 g                    | 0.04 g             | -                 |
| CP7       | 0.4 g                | 0.2 g                    | -                  | 0.02 g            |
| CP8       | 0.4 g                | 0.2 g                    | -                  | 0.04 g            |
| CP9       | 0.4 g                | 0.2 g                    | 0.02 g             | 0.02 g            |
| CP10      | 0.4 g                | 0.2 g                    | 0.04 g             | 0.04 g            |
| CP11      | 0.4 g                | 0.2 g                    | 0.04 g             | 0.02 g            |
| CP12      | 0.4 g                | 0.2 g                    | 0.02 g             | 0.04 g            |

PVA: Polyvinyl alcohol, COS: Chitooligosaccharides, and GA: Gallic acid

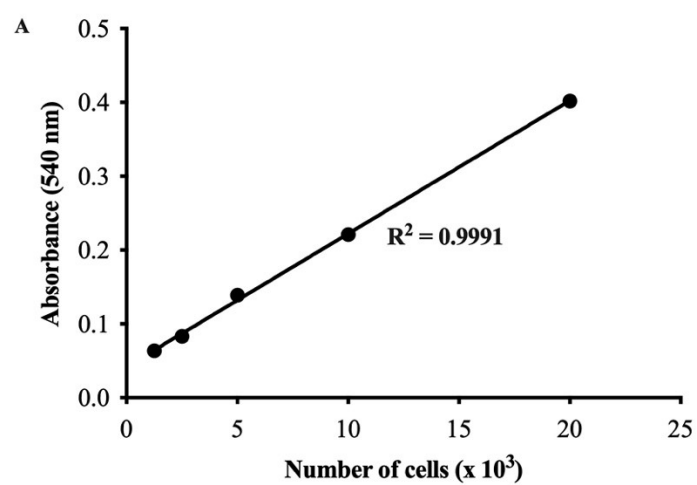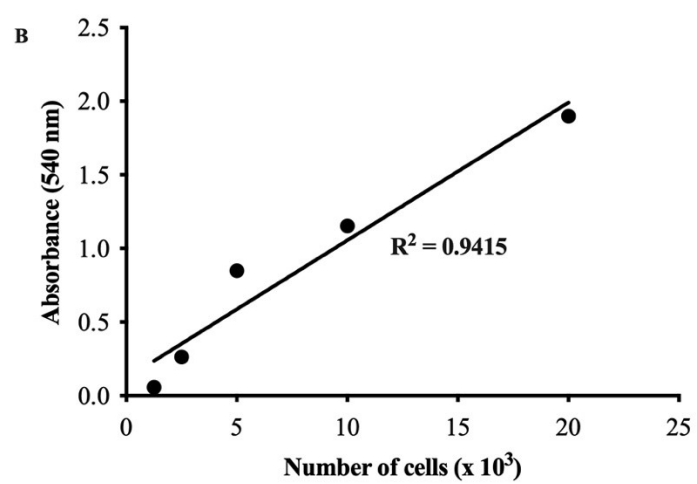

**Fig. S1** Standard curve of HaCaT (A) and Caco-2 cells (B).
